# Supplementary material for: Long-term behavior and side chain crystallization of poly(3-alkyl thiophenes)
Source: Royal Society of Chemistry journal article supplement (doi:10.1039/c002852e), 2010-01-01
Supplement: c002852e.pdf [file c002852e.pdf]

## Long-term behavior and side chain crystallization of poly(3-alkyl thiophenes)

Shireesh Pankaj and Mario Beiner\*

*Institut für Physik, Martin-Luther-Universität Halle-Wittenberg, D-06099 Halle, Germany*

### Supplementary material - Isotherms from shear measurements

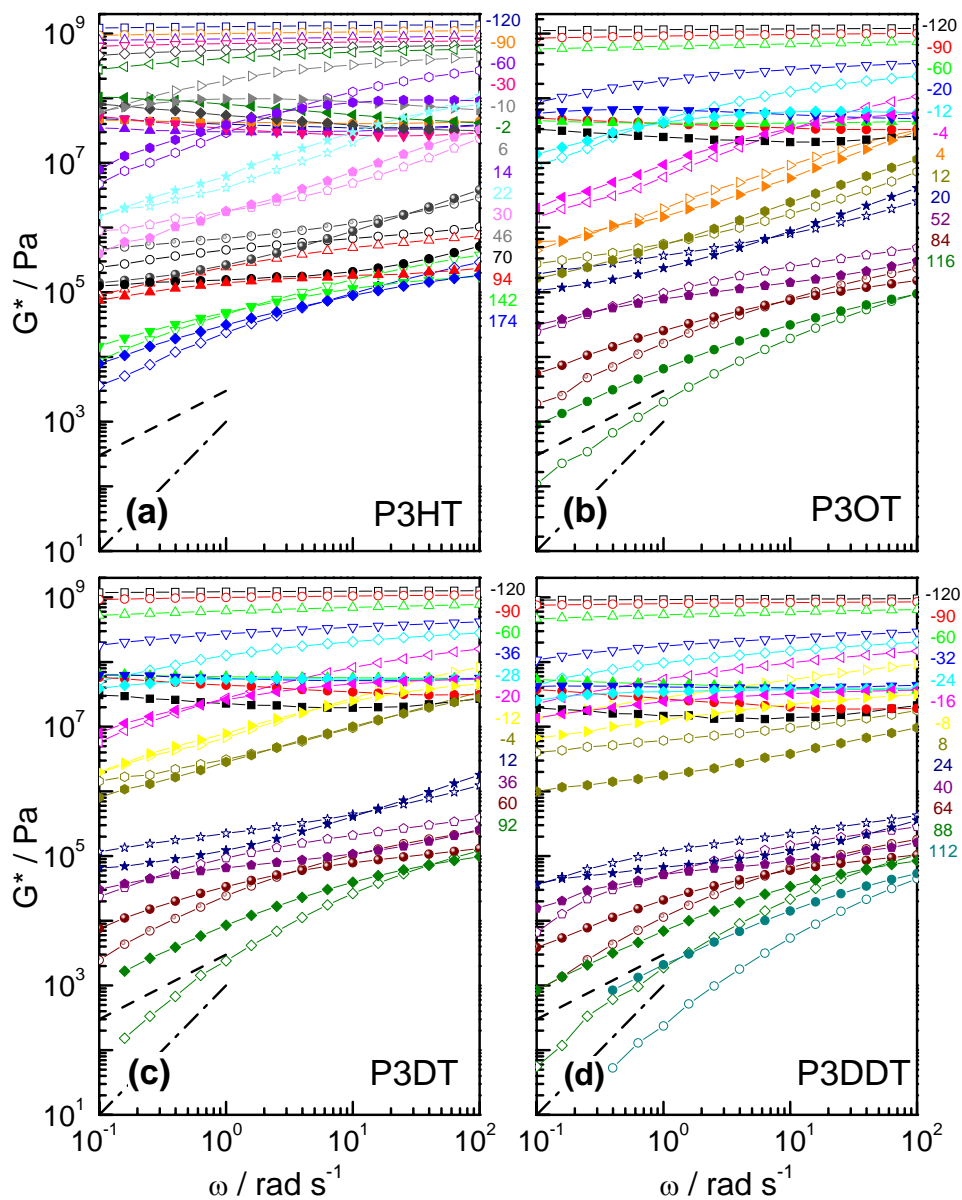

**Figure S1.** Shear storage modulus  $G'$  (open symbols) and shear loss modulus  $G''$  (solid symbols) vs. angular frequency for regio-random (a) P3HT, (b) P3OT, (c) P3DT and (d) P3DDT measured at different temperatures. The lines indicate the slopes  $G' \propto \omega^2$  (dashed dotted) and  $G'' \propto \omega$  (dashed) expected for a Newtonian liquid. The labels indicate the measurement temperatures.

\*Electronic address: beiner@physik.uni-halle.de
